# Supplementary material for: The relationship between Frailty, Health literacy, and Medication adherence in older adults
Source: Research Square preprint supplement (doi:10.21203/rs.3.rs-7345167/v1), 2025-10-17
Supplement: Supplementary file 1 [file 53ef2cfadf4c2e65ef7bdf1b.pdf]

| (Please check your answer below)                                                  |           |            |
|-----------------------------------------------------------------------------------|-----------|------------|
| 1. Do you ever forget to take your medicine?                                      | <i>No</i> | <i>Yes</i> |
| 2. Are you careless at times about taking your medicine?                          | <i>No</i> | <i>Yes</i> |
| 3. When you feel better do you sometime stop taking your medicine?                | <i>No</i> | <i>Yes</i> |
| 4. Sometimes if you feel worse when you take the medicine, do you stop taking it? | <i>No</i> | <i>Yes</i> |

Scoring: high-low; yes= 0; no= 1

Range: 0-4

Mean: (weighted): n = 290; x

Cronbach alpha: 0.61
